# Supplementary material
Source: publisher figshare collection journal article supplement (https://gsajournals.figshare.com/ndownloader/files/17419040)
Supplement: Supplementary file 1 [file 17419040]

| Drug         | Class                  | Manufacturer  | Conc. In experiment |
|--------------|------------------------|---------------|---------------------|
| CP-615003-27 | GABA-A antagonist      | Pfizer        | 40 $\mu$ M          |
| Picrotoxin   | GABA-A antagonist      | Tocris        | 100 $\mu$ M         |
| TPMPA        | GABA-A antagonist      | Tocris        | 100 $\mu$ M         |
| GABA         | GABA-A agonist         | Sigma-Aldrich | 50 mM               |
| GABOB        | GABA-A agonist         | Sigma-Aldrich | 100 $\mu$ M         |
| L, 838-417   | GABA-A partial agonist | Tocris        | 100 $\mu$ M         |
| MK 0343      | GABA-A partial agonist | Tocris        | 100 $\mu$ M         |
| CI-966 HCL   | GABA uptake inhibitor  | Tocris        | 20 $\mu$ M          |

**Table S1: List of GABA-A receptor pharmacology used in the study.** Each drug was obtained from the indicated manufacturer and handled according to vendor guidelines.

| Primer                            | Sequence (5' – 3')                                           |
|-----------------------------------|--------------------------------------------------------------|
| <i>gabrr1</i> guide RNA           | ggatgaaggagcgcttggag                                         |
| pT7-gRNA oligo: <i>gabrr1</i>     | aattaatacgactcactataggatgaaggagcgcttggaggttttagagctagaaatagc |
| <i>gabrr1</i> genotype_Hpy166II_F | tggaacgggattaaactgagc                                        |
| <i>gabrr1</i> genotype_Hpy166II_R | aaaatgcaagacccggagat                                         |
| <i>gabrr1</i> sequencing primer F | ctgtgttatcagcagtaagcg                                        |
| <i>gabrr1</i> sequencing primer R | gggcagctgtaaaatcagagt                                        |
| <i>gabrr1</i> cDNA cloning_Pac1_F | ggcgatcgcttaattaatgttgagggaagacagctcca                       |
| <i>gabrr1</i> cDNA cloning_Pac1_R | cctgcagggttaattaatcactgtgagtagatggaccagt                     |

**Table S2: Sequences of primers and oligos used in the study.** Each primer or oligo was purchased from Integrated DNA Technologies (IDT).

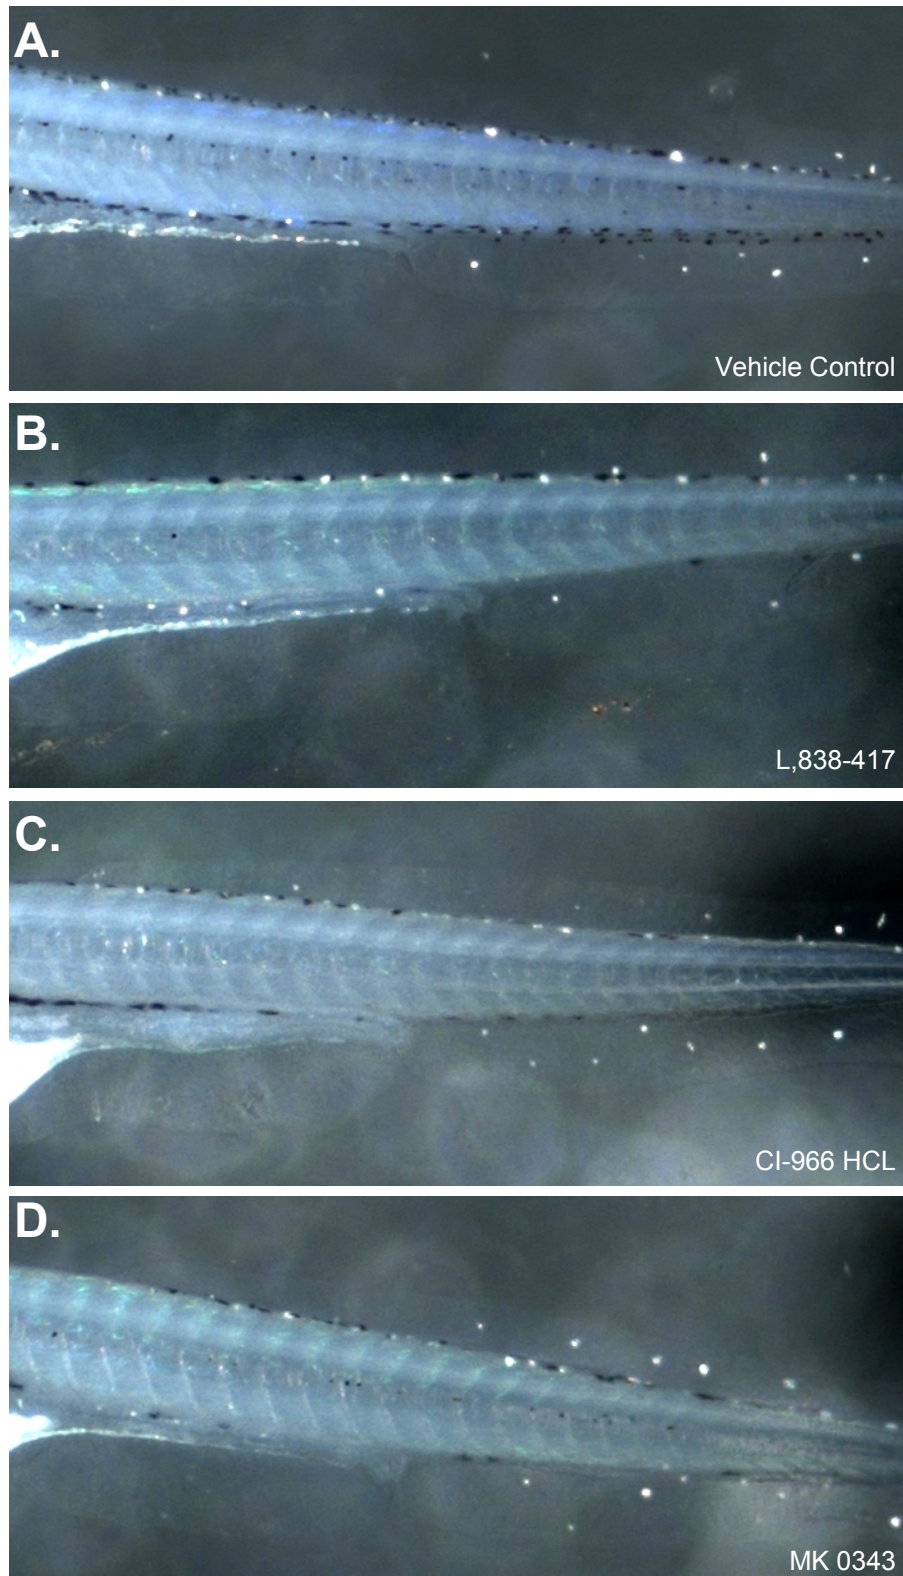

**Figure S1: Pharmacological activation of GABA-A reduces larval pigmentation across the body.** (A-D) Images of representative *mitfa<sup>vc7</sup>* 7 dpf larvae treated with vehicle control (A), L,838-417 (B), CI-966 HCL (C), and MK 0343 (D).

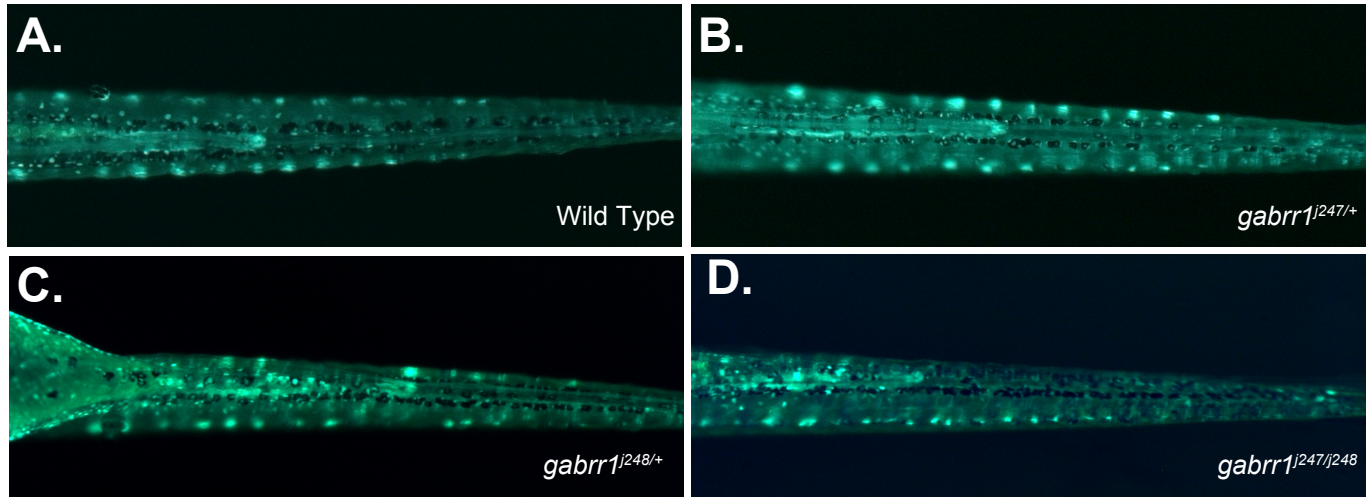

**Figure S2: *gabrr1* mutations have no visible effect on ventral pigmentation.** (A-D) Images of representative 6 dpf wild-type (A), *gabrr1*<sup>j247/+</sup> (B), *gabrr1*<sup>j248/+</sup> (C), and *gabrr1*<sup>j247/j248</sup> (D) larvae.

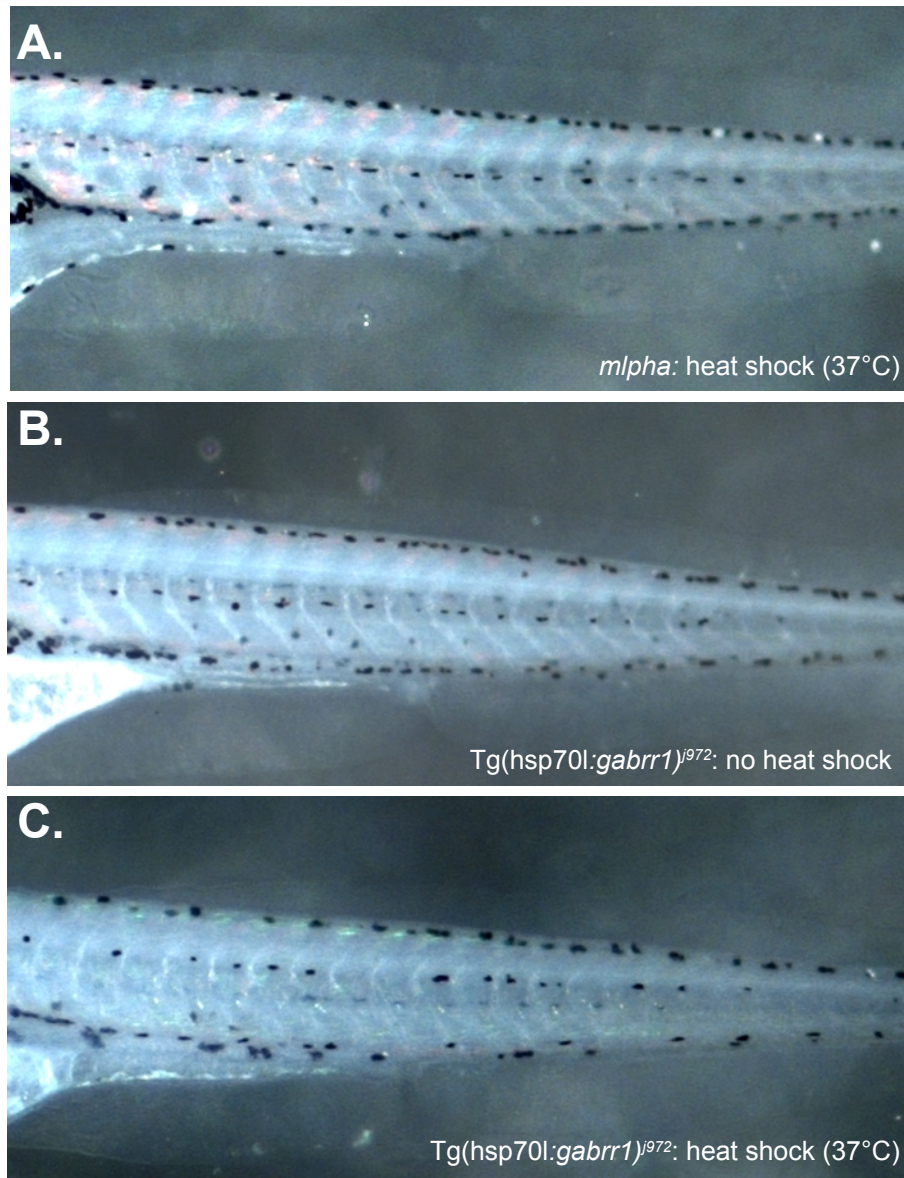

**Figure S3: Over-expression of *gabrr1* partially reduces ventral pigmentation.** (A-C) Images of representative 6 dpf heat shocked *mlpha* (A), Tg(hsp70l:*gabrr1*)<sup>j972</sup> (B), and Tg(hsp70l:*gabrr1*)<sup>j972</sup> + heat shock (C).
